# Supplementary material for: Tuning the electronic coupling in Mo2–Mo2systems by variation of the coordinating atoms of the bridging ligands
Source: Royal Society of Chemistry journal article supplement (doi:10.1039/c4dt00786g), 2014-08-06

Supporting Information for  
**Tuning the Electronic Coupling in Mo<sub>2</sub>-Mo<sub>2</sub> System by Variation of  
the Coordinating Atoms of the Bridging Ligands**

Yao Shu,<sup>1</sup> Hao Lei,<sup>1</sup> Yingning Tan,<sup>1</sup> Miao Meng,<sup>1</sup> Xiaochun Zhang<sup>2</sup> and Chun Y. Liu\*<sup>1,2</sup>

<sup>1</sup> Department of Chemistry, Jinan University, 601 Huang-Pu Avenue West, Guangzhou 510632,

China

<sup>2</sup> Department of Chemistry, Tongji University, 1239 Siping Road, Shanghai 200092, China

**Figure S1.** <sup>1</sup>H NMR spectrum for **1**

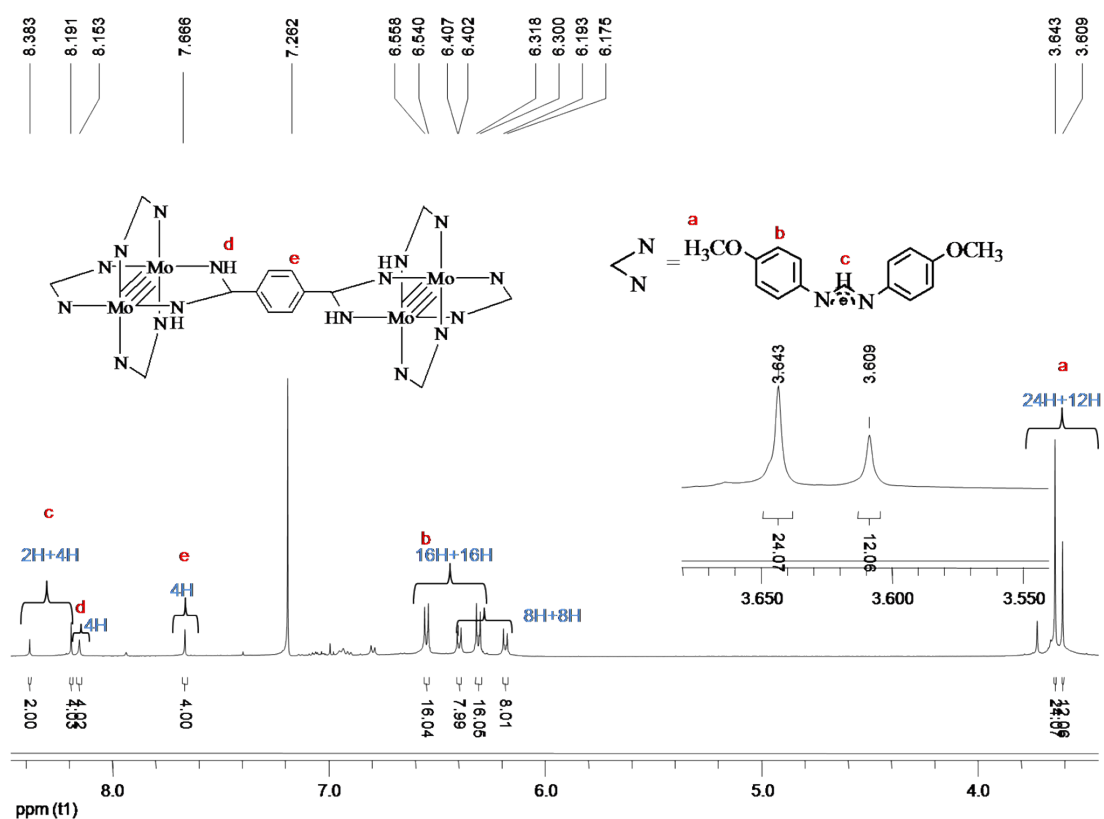

Figure S2. <sup>1</sup>H NMR spectrum for **2**

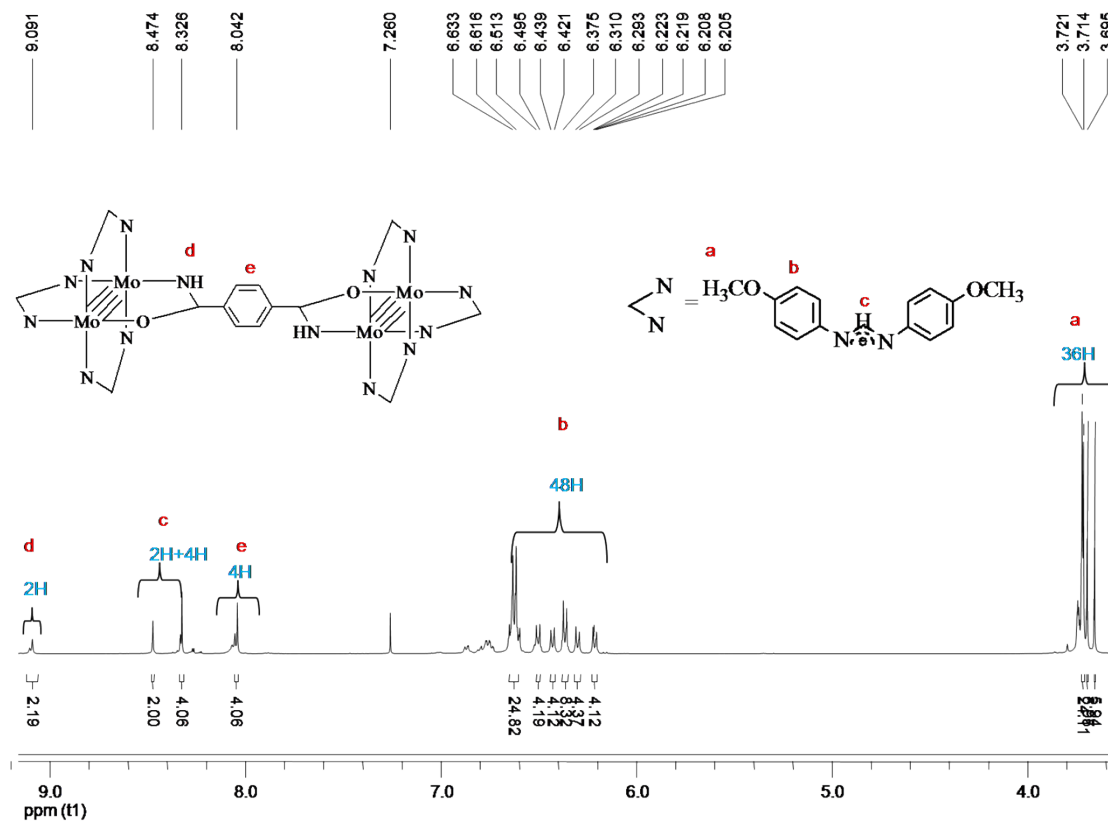

Figure S3.  $^1\text{H}$  NMR spectrum for **3**

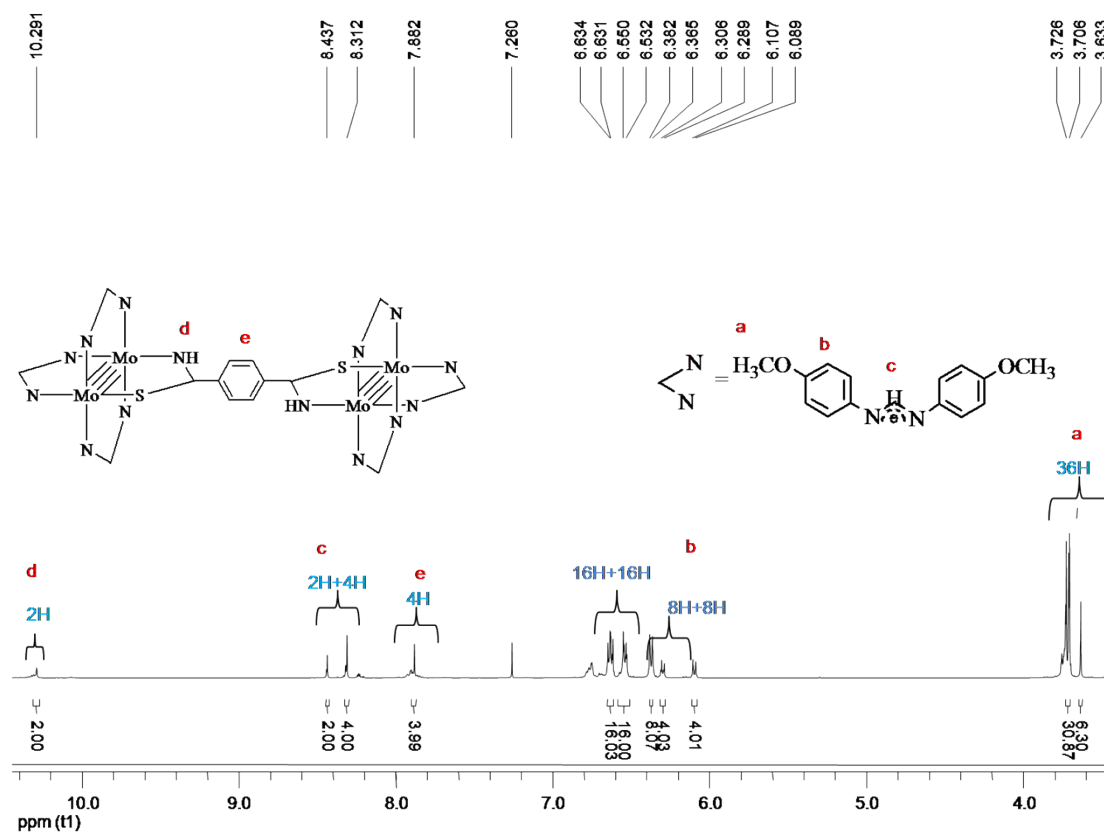

Supplement: c4dt00786g1.pdf [file c4dt00786g1.pdf]
